# Supplementary material
Source: PubMed Central journal article supplement (PMC3259198)
Supplement: NIHMS343237-supplement-1_si_001.pdf [file NIHMS343237-supplement-1_si_001.pdf]

# In Vivo Neurochemical Monitoring using Benzoyl Chloride Derivatization and Liquid Chromatography – Mass Spectrometry

Peng Song, Omar S. Mabrouk, Neil D. Hershey, and Robert T. Kennedy

|                  |                                                                                 |
|------------------|---------------------------------------------------------------------------------|
| <b>Figure S1</b> | Signal variation of repeated injection with and without internal standard.      |
| <b>Figure S2</b> | Chromatographic traces of analytes detected in rat nucleus accumbens dialysate. |
| <b>Figure S3</b> | Neurotransmitter level in rat VTA and NAc upon bicuculline infusion.            |
| <b>Table S1</b>  | MS/MS conditions of analytes.                                                   |

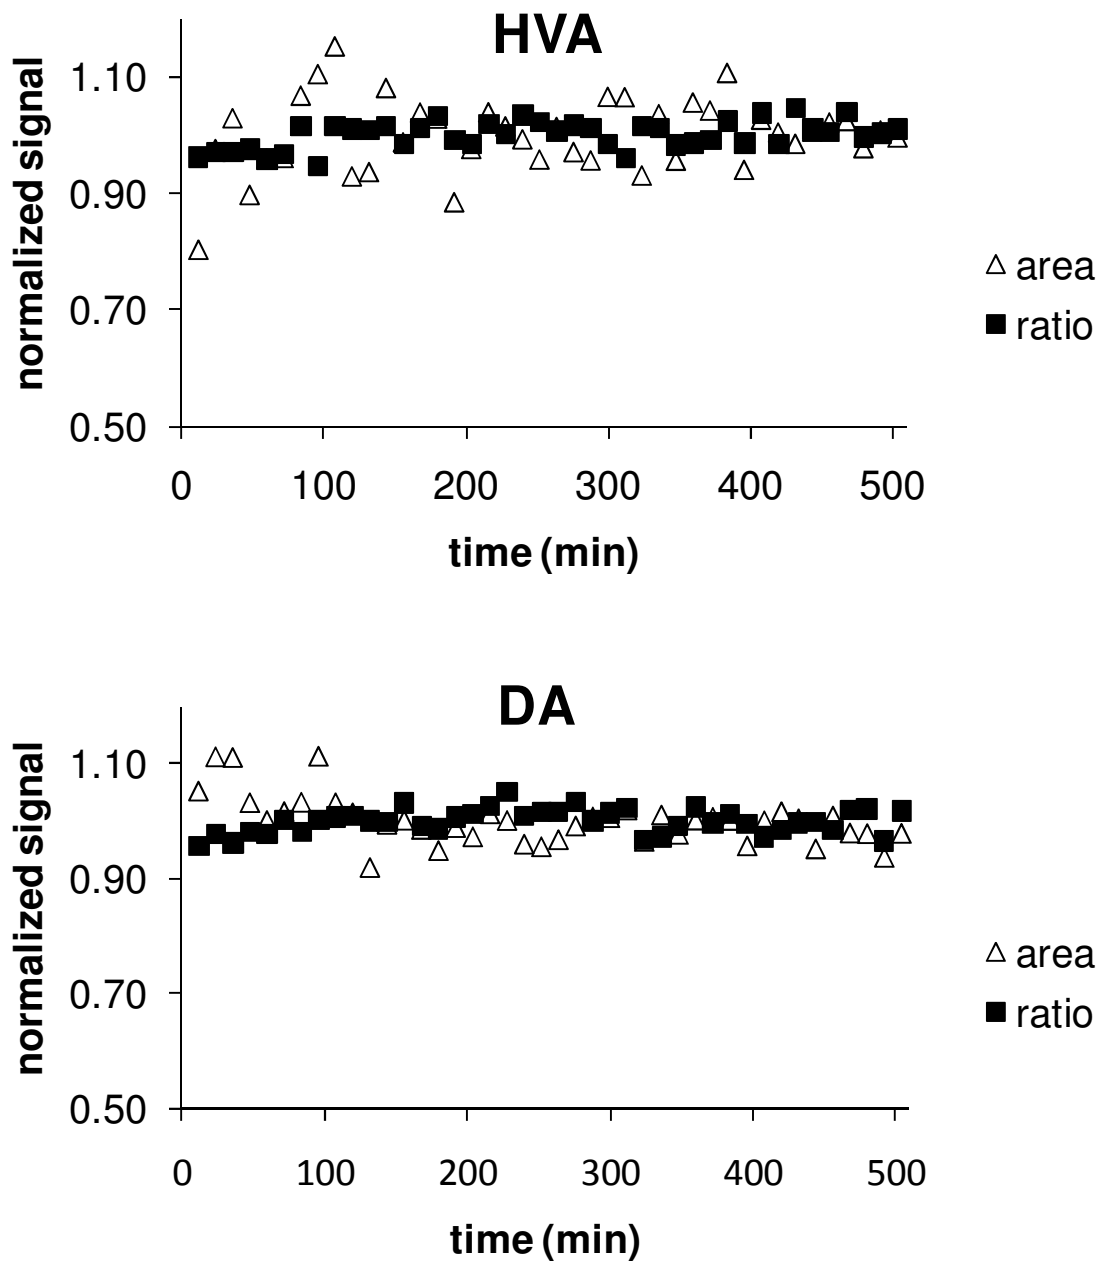

**Figure S1.** Peak area and peak area ratio of HVA (top) and DA (bottom) in a repeatedly analyzed standard solution. Signals were normalized to their respective averages. RSD was 6% for HVA and 4% for DA using only peak area. It was reduced to 2% for both HVA and DA when peak area ratio to internal standard was used for quantification.

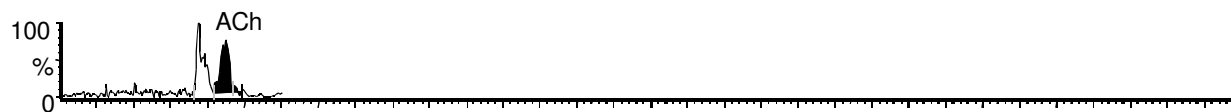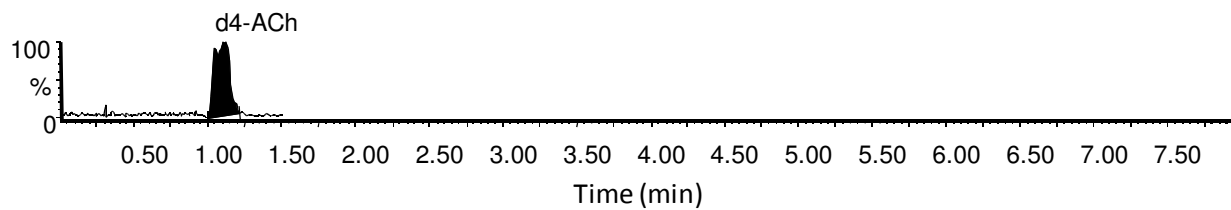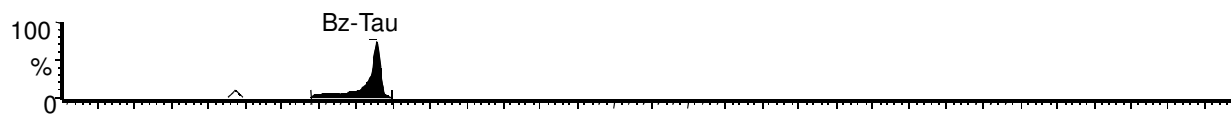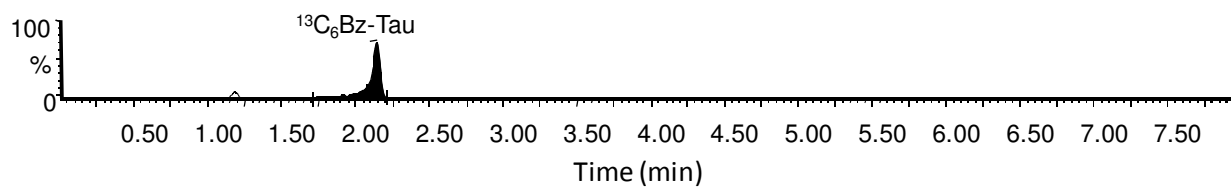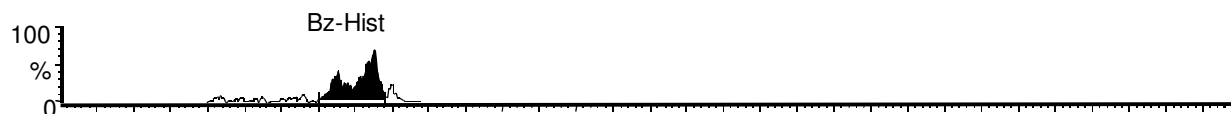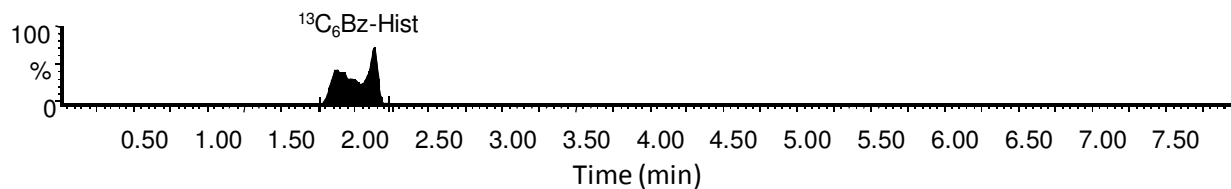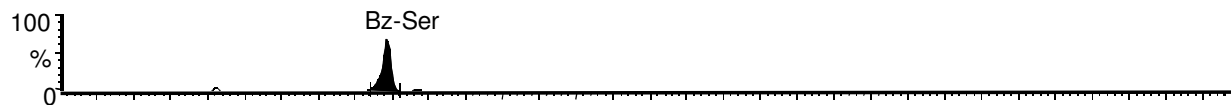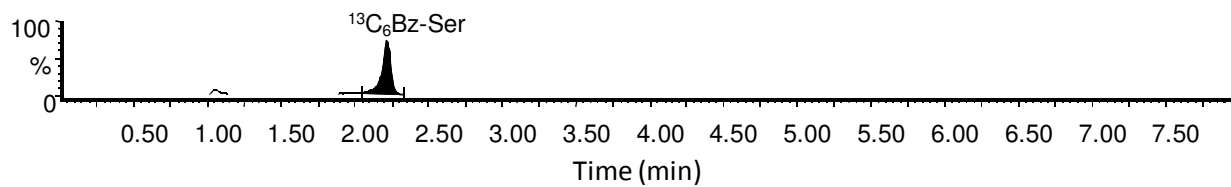

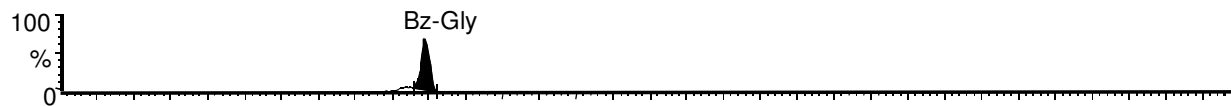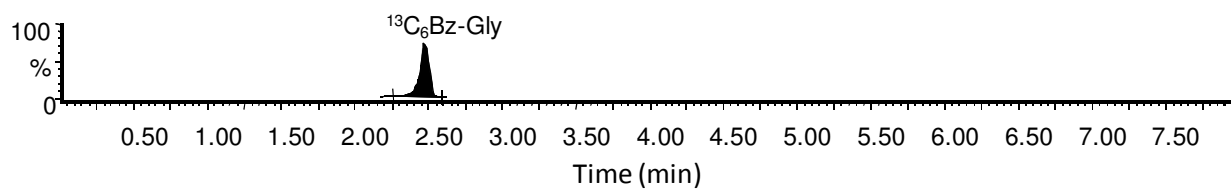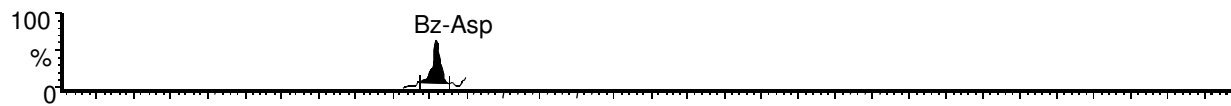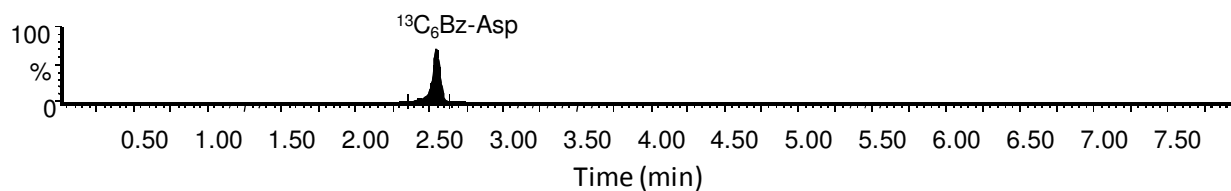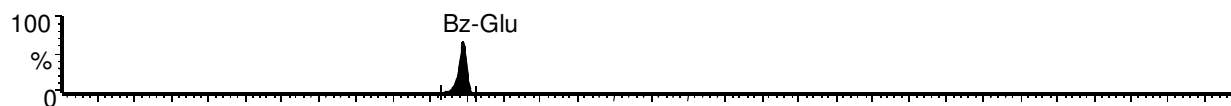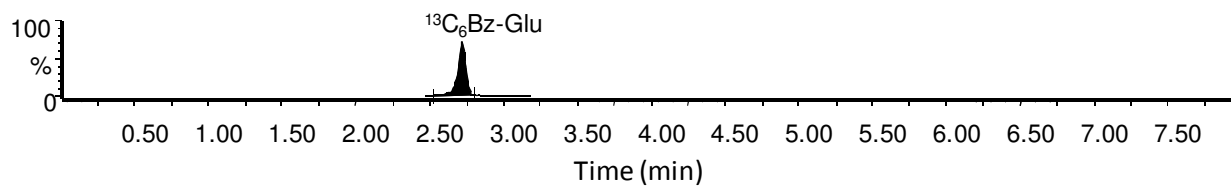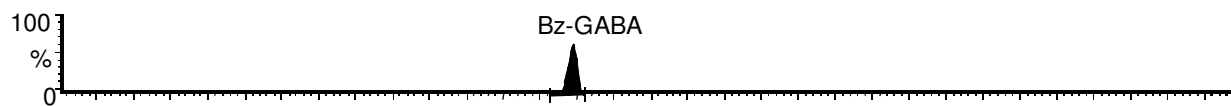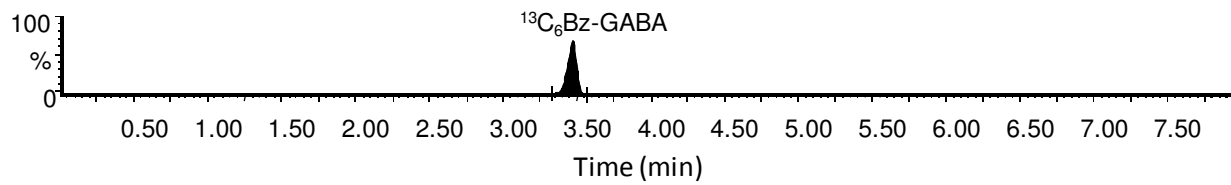

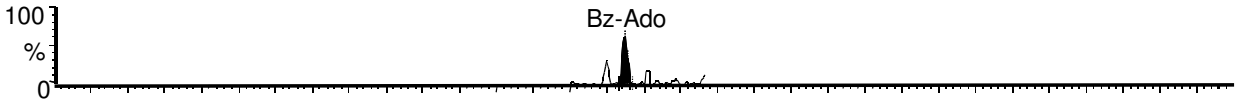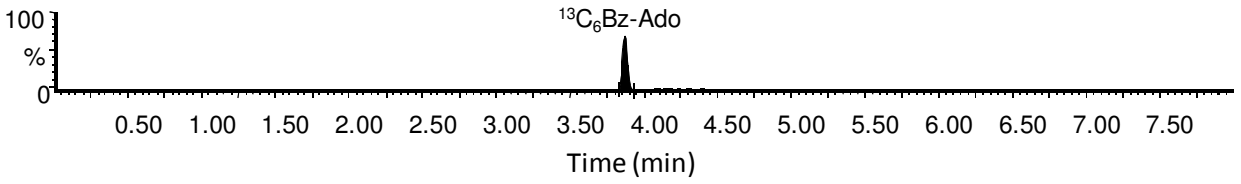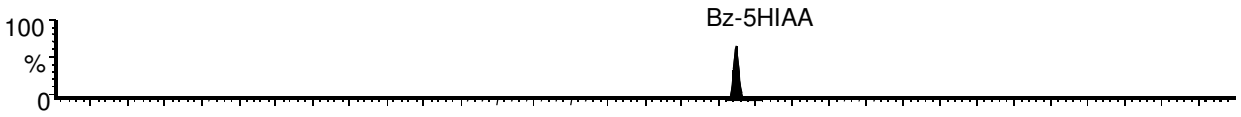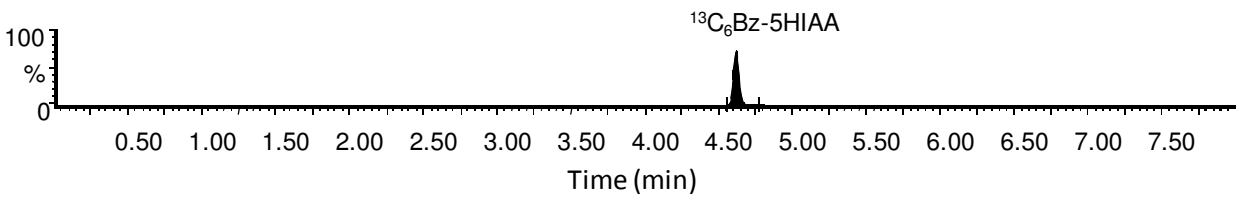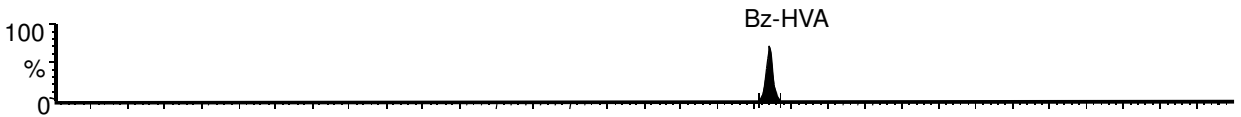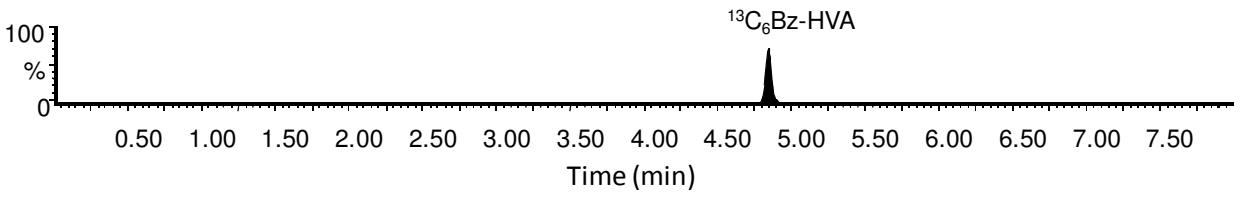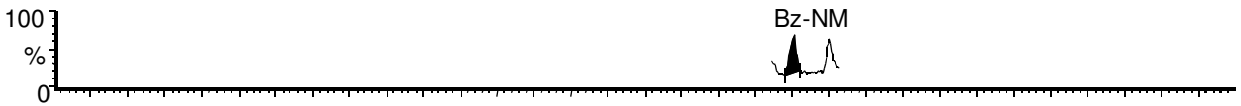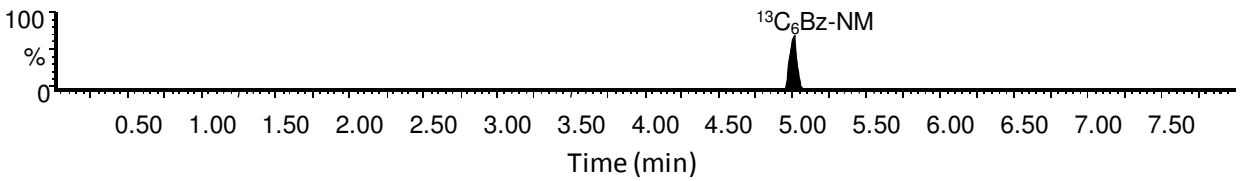

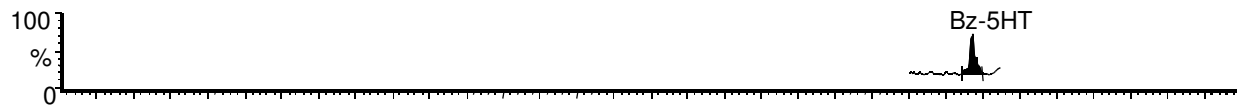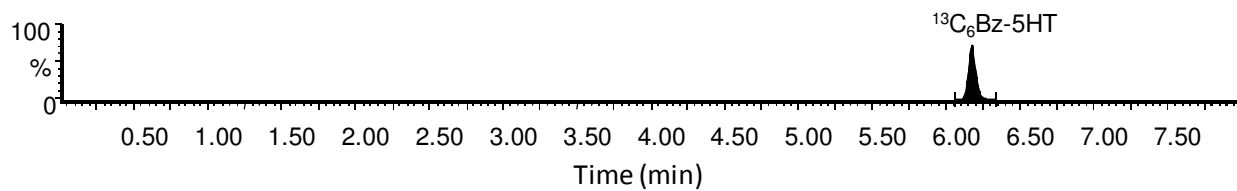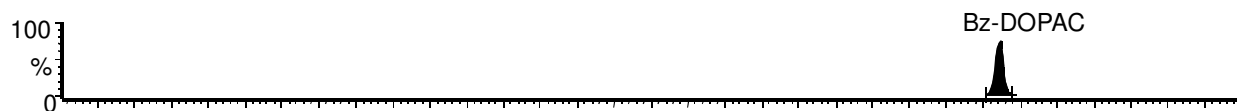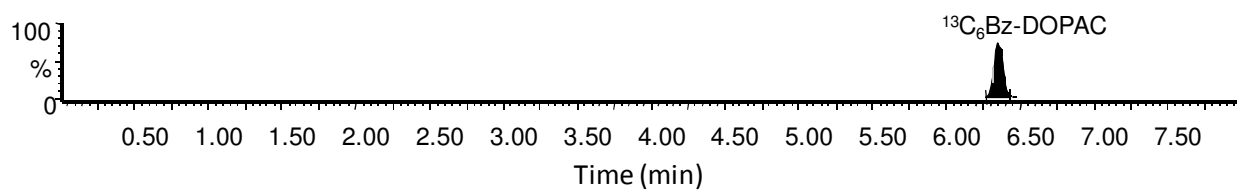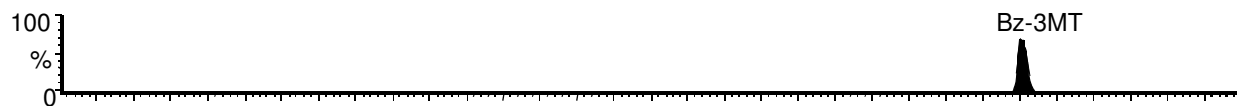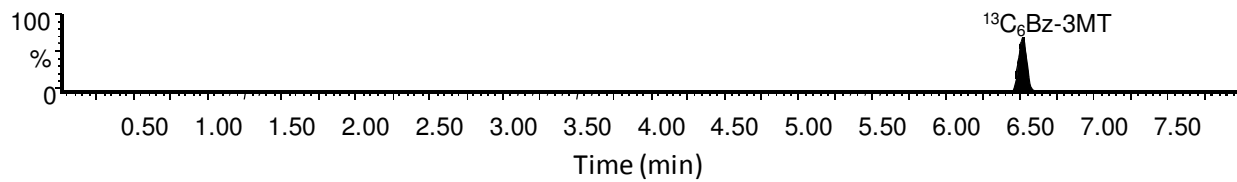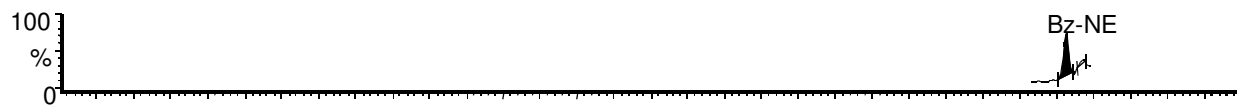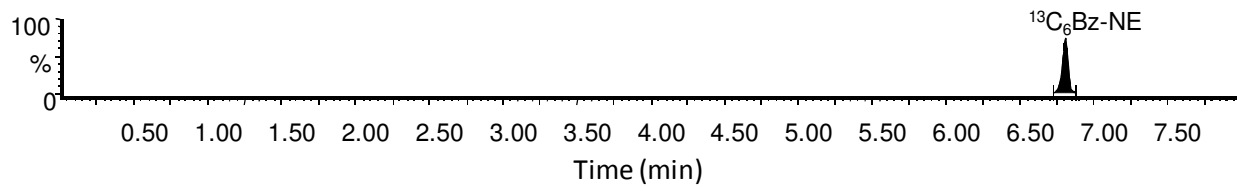

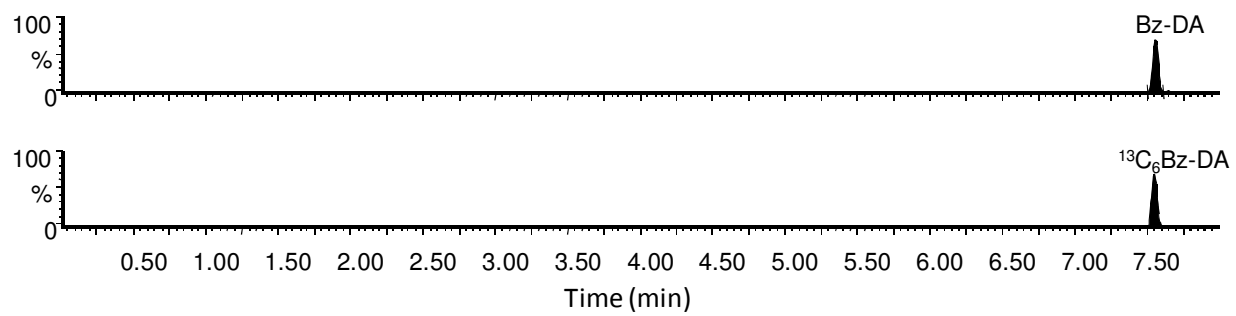

**Figure S2.** Mass chromatogram traces of neurotransmitters and metabolites detected *in vivo* from rat nucleus accumbens. Probe size was 1.5 mm and dialysis flow rate was 0.6  $\mu$ L/min.

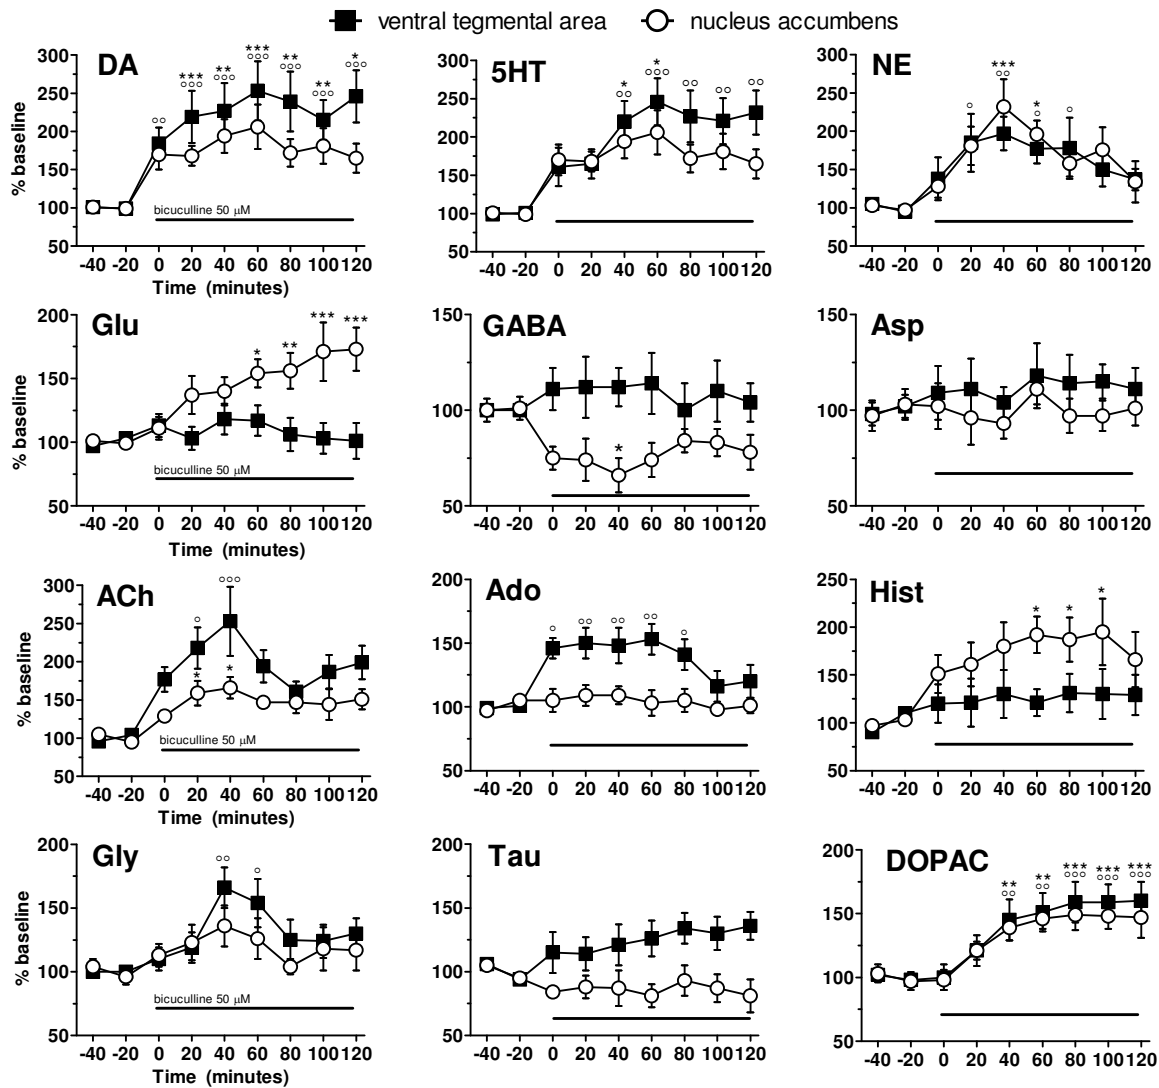

**Figure S3 (related to Figure 4).** Unilateral dual probe microdialysis of the mesolimbic pathway.

Bicuculline (50  $\mu\text{M}$ ) was perfused (black bar) in the VTA while monitoring neurotransmitters locally in VTA (black squares) and distally in the NAc (open circles). Dialysate was collected every 20 min. Error bar is SEM ( $n = 8$ ). Data was expressed as percent of baseline levels. RM ANOVA and a post hoc Tukey test to compare basal levels against post drug levels. \* $p < 0.05$ , \*\* $p < 0.01$ , \*\*\* $p < 0.001$  compared to basal NA levels. ° $p < 0.05$ , °° $p < 0.01$ , °°° $p < 0.001$  compared to basal VTA levels.



**Table S1.** MRM conditions of 17 benzoylated neurotransmitters and metabolites and their internal standards.

| analyte                               | precursor m/z | product m/z | cone voltage (V) | collision energy | dwel time (ms) |
|---------------------------------------|---------------|-------------|------------------|------------------|----------------|
| ACh                                   | 146           | 87          | 35               | 15               | 150            |
| d <sub>4</sub> -ACh                   | 150           | 91          | 35               | 15               | 150            |
| Bz-Gly                                | 180           | 105         | 35               | 10               | 75             |
| <sup>13</sup> C <sub>6</sub> Bz-Gly   | 186           | 111         | 35               | 10               | 75             |
| Bz-GABA                               | 208           | 105         | 35               | 20               | 150            |
| <sup>13</sup> C <sub>6</sub> Bz-GABA  | 214           | 111         | 35               | 20               | 150            |
| Bz-Ser                                | 210           | 105         | 35               | 20               | 50             |
| <sup>13</sup> C <sub>6</sub> Bz-Ser   | 216           | 111         | 35               | 20               | 50             |
| Bz-Hist                               | 216           | 105         | 35               | 20               | 50             |
| <sup>13</sup> C <sub>6</sub> Bz-Hist  | 222           | 111         | 35               | 20               | 50             |
| Bz-Tau                                | 230           | 105         | 35               | 10               | 50             |
| <sup>13</sup> C <sub>6</sub> Bz-Tau   | 236           | 111         | 35               | 10               | 50             |
| Bz-Asp                                | 238           | 105         | 35               | 10               | 75             |
| <sup>13</sup> C <sub>6</sub> Bz-Asp   | 244           | 111         | 35               | 10               | 75             |
| Bz-Glu                                | 252           | 105         | 35               | 20               | 150            |
| <sup>13</sup> C <sub>6</sub> Bz-Glu   | 258           | 111         | 35               | 20               | 150            |
| Bz-Ado                                | 372           | 136         | 35               | 30               | 75             |
| <sup>13</sup> C <sub>6</sub> Bz-Ado   | 378           | 136         | 35               | 30               | 75             |
| Bz-5HT                                | 385           | 264         | 60               | 20               | 150            |
| <sup>13</sup> C <sub>6</sub> Bz-5HT   | 397           | 270         | 60               | 20               | 150            |
| Bz-NE                                 | 482           | 105         | 60               | 30               | 150            |
| <sup>13</sup> C <sub>6</sub> Bz-NE    | 500           | 111         | 60               | 30               | 150            |
| Bz-DA                                 | 466           | 105         | 70               | 30               | 150            |
| <sup>13</sup> C <sub>6</sub> Bz-DA    | 484           | 111         | 70               | 30               | 150            |
| Bz-HVA                                | 304           | 105         | 35               | 15               | 150            |
| <sup>13</sup> C <sub>6</sub> Bz-HVA   | 310           | 111         | 35               | 15               | 150            |
| Bz-5HIAA                              | 313           | 146         | 35               | 15               | 150            |
| <sup>13</sup> C <sub>6</sub> Bz-5HIAA | 319           | 146         | 35               | 15               | 150            |
| Bz-NM                                 | 374           | 105         | 60               | 15               | 150            |

|                                       |     |     |    |    |     |
|---------------------------------------|-----|-----|----|----|-----|
| <sup>13</sup> C <sub>6</sub> Bz-NM    | 386 | 111 | 60 | 15 | 150 |
| Bz-3MT                                | 376 | 105 | 35 | 20 | 150 |
| <sup>13</sup> C <sub>6</sub> Bz-3MT   | 388 | 111 | 35 | 20 | 150 |
| Bz-DOPAC                              | 394 | 105 | 35 | 20 | 150 |
| <sup>13</sup> C <sub>6</sub> Bz-DOPAC | 406 | 111 | 35 | 20 | 150 |
